# Supplementary material for: 590 nm LED Irradiation Improved Erythema through Inhibiting Angiogenesis of Human Microvascular Endothelial Cells and Ameliorated Pigmentation in Melasma
Source: Cells. 2022 Dec 7;11(24):3949. doi: 10.3390/cells11243949 (PMC9776419; doi:10.3390/cells11243949)
Supplement: Supplementary file 1 [file cells-11-03949-s001.zip › cells-2078827-supplementary.pdf]

**Table S1.** Primer list

| Gene  | Forward Primer                   | Reverse Primer                    |
|-------|----------------------------------|-----------------------------------|
| VEGF  | 5'CAG AAG GAG GAG GGC AGA A 3'   | 5'GTC TCG ATT GGA TGG CAG TAG 3'  |
| SCF   | 5'CTG TTC AAA GCA AAT CCA GAT 3' | 5' AGG AAC CAC AGC ATG TTA GAG 3' |
| TGFβ1 | 5'ACC TGA ACC CGT GTT GCT CT 3'  | 5'CGC CAG GAA TTG TTG CTG TA 3'   |
| ET-1  | 5'GAG AAA CAG CGT CAA ATC ATC 3' | 5' CCG AAG GTC TGT CAC CAA T 3'   |

Primers all from BioTNT, Shanghai, China. VEGF, vascular endothelial growth factor; SCF, stem cell factor; ET-1, endothelin 1; TGFβ1, transforming growth factor-β1.

**Table S2.** 10 µL reserve transcription system

| Reagent                       | Dosage      |
|-------------------------------|-------------|
| 5 × PrimeScript RT Master Mix | 2 µL        |
| Total RNA                     | 500 ng      |
| RNase Free dH <sub>2</sub> O  | up to 10 µL |

**Table S3.** Reverse transcription protocol

| Step                           | Condition     |
|--------------------------------|---------------|
| Reverse transcription reaction | 37 °C, 15 min |
| Inactivation                   | 85 °C, 5 s    |
| 4 °C hold                      |               |

**Table S4.** 10 µL RT-qPCR system

| Reagent                       | Dosage |
|-------------------------------|--------|
| 2 × TB Green Premix Ex Taq II | 5 µL   |
| PCR Forward Primer            | 0.4 µL |
| PCR Reverse Primer            | 0.4 µL |
| ROX Reference Dye or Dye II   | 0.2 µL |
| cDNA                          | 1 µL   |
| RNase Free dH <sub>2</sub> O  | 3 µL   |

**Table S5.** Two step RT-qPCR protocol

| Step                 | Condition                            |
|----------------------|--------------------------------------|
| Initial denaturation | Reps: 1; 95 °C, 30 s                 |
| PCR reaction         | Reps: 40; 95 °C, 5 s; 60 °C, 30–34 s |

Reps, Repetitions.

**Table S6.** Subject characteristics

| Characteristic                      | Total ( <i>n</i> = 10) |
|-------------------------------------|------------------------|
| Females, <i>n</i> (%)               | 9 (90.00)              |
| Age, mean (SD), y                   | 43.80 (5.29)           |
| Fitzpatrick skin type, <i>n</i> (%) |                        |
| III                                 | 4 (40.00)              |
| IV                                  | 6 (60.00)              |
| Duration of melasma (mean, SD), y   | 4.80 (1.23)            |

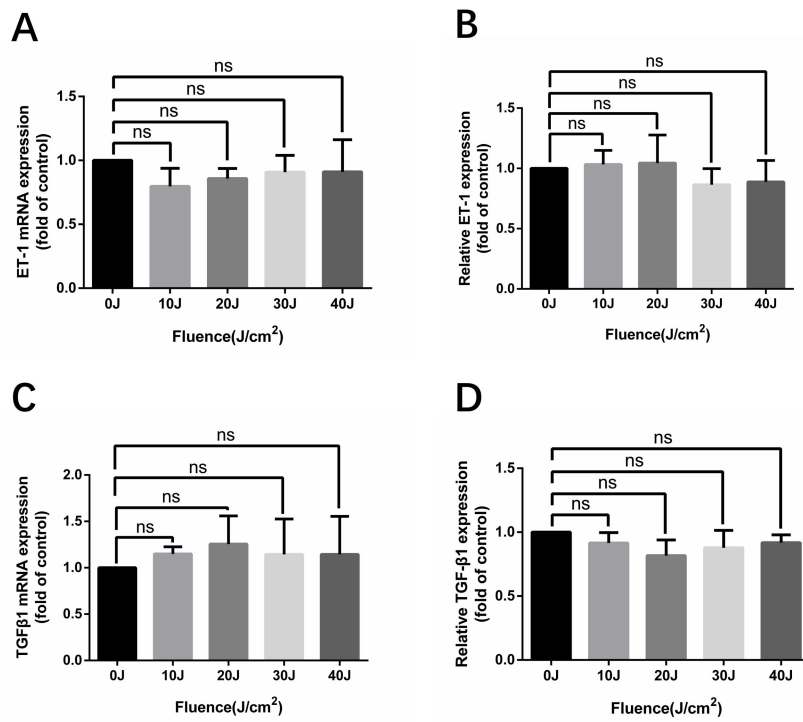

**Figure S1.** The mRNA and protein expression of ET-1 and TGFβ1 in HMEC-1 24 h after 590 nm LED irradiation. (A,B) The synthesis and release of ET-1 in HMEC-1 detected by RT-qPCR and ELISA. (C,D) The synthesis and release of TGFβ1 in HMEC-1. Data of irradiated groups are normalized to the control and three independent experiment results are expressed as means ± SD. ET-1, endothelin 1; TGFβ1, transforming growth factor-β1; n.s., no significance.

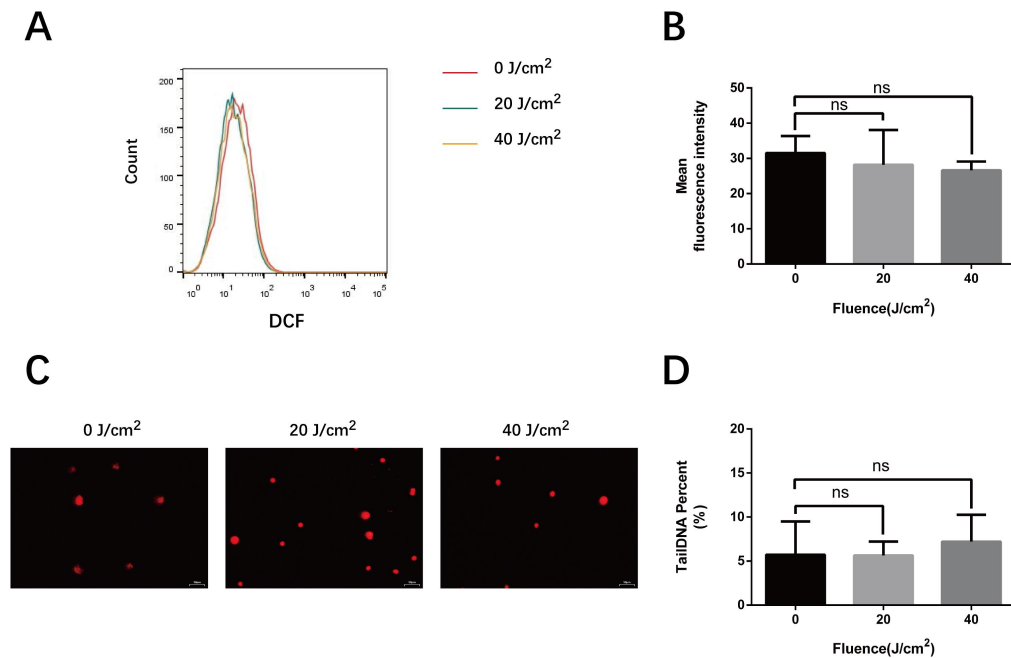

**Figure S2.** The reactive oxygen species (ROS) level and DNA damage condition in HMEC-1 24 h after 590 nm LED irradiation. (A,B) ROS-positive cells and mean fluorescence intensity measured by flow cytometry analysis (dyed with DCF-DA). (C,D) Fluorescence photographs and tailDNA percent of irradiated cells in comet assay to measure DNA damage. B-D Three independent experiments were performed and results are shown as means ± SD.
